# Supplementary material for: selSeq: A method for the enrichment of non-polyadenylated RNAs including enhancer and long non-coding RNAs for sequencing
Source: PubMed Central journal article supplement (PMC10684010; doi:10.1371/journal.pone.0289442), 2023-11-28
Supplement: pone.0289442.s001.pdf [file pone.0289442.s001.pdf]

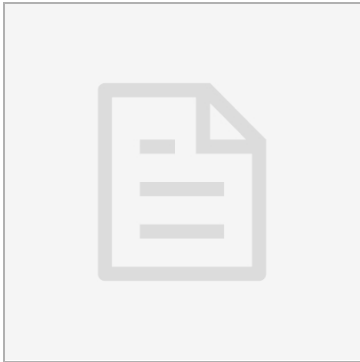

# 🔒 selSeq: A method for the enrichment of non-polyadenylated RNAs including enhancer and long non-coding RNAs for sequencing 👥

Jason D Limberis<sup>1</sup>, John Joel Ernst<sup>1</sup>, Metcalfe<sup>1</sup>, Alina Nalyvayko<sup>1</sup>

<sup>1</sup>University of California, San Francisco

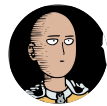

Jason D Limberis  
University of California, San Francisco

**Protocol Info:** Jason D Limberis, Joel Ernst, John Metcalfe, Alina Nalyvayko . selSeq: A method for the enrichment of non-polyadenylated RNAs including enhancer and long non-coding RNAs for sequencing. **protocols.io** <https://protocols.io/view/selseq-a-method-for-the-enrichment-of-non-polyaden-crymv7u6>

**Created:** Mar 28, 2023

**Last Modified:** Jun 12, 2023

**PROTOCOL integer ID:** 79597

## ABSTRACT

Non-polyadenylated RNA includes a large subset of crucial regulators of RNA expression and constitutes a substantial portion of the transcriptome, playing essential roles in gene regulation. For example, enhancer RNAs are long non-coding RNAs that perform enhancer-like functions, are bi-directionally transcribed, and usually lack polyA tails. This paper presents a novel method, *seSeq*, that selectively removes mRNA and pre-mRNA from samples to enable the selective sequencing of crucial regulatory elements, including non-polyadenylated RNAs such as long non-coding RNA, enhancer RNA, and non-canonical mRNA.

## MATERIALS

### Required

🔗 SuperScript® III First-Strand Synthesis System Thermo Scientific Catalog #18080-051

🔗 RNase H - 1,250 units New England Biolabs Catalog #M0297L

🔗 TURBO DNase 2 U/uL Fisher Scientific Catalog #AM2239

🔗 Agencourt RNAClean XP Magnetic Beads Beckman Coulter Catalog #A63987

🔗 Ethanol Contributed by users

A thermocycler and a qPCR machine

A magnetic rack

### Optional

🔗 Luna Universal Probe One-Step RT-qPCR Kit - 200 rxns New England Biolabs Catalog #E3006S

🔗 Eukaryotic 18S rRNA Endogenous Control (FAM™/MGB probe, non-primer limited) Thermo Fisher Catalog #4333760F

🔗 TaqMan™ GAPDH Control Reagents (human) Thermo Fisher Catalog #402869

rRNA depletion oligos

## BEFORE START INSTRUCTIONS

Prewarm SuperScript III 10X Buffer to  Room temperature

### poly-A tailed cDNA synthesis

1 Mix the following in a 0.2ml tube

| A                              | B           |
|--------------------------------|-------------|
| Component                      | Volume (µl) |
| Total RNA                      | 1           |
| Oligo dTs                      | 1.5         |
| 10 mM dNTP mix                 | 1.5         |
| Nuclease-free H <sub>2</sub> O | 10          |

poly-A tailed cDNA reaction synthesis components

2 Denature sample RNA/primer mixture for  00:05:00 at  65 °C then cool to  4 °C for  7m  
≥  00:02:00

3 Spin tube briefly and add the following and mix by pipetting  55m

| A                                     | B           |
|---------------------------------------|-------------|
| Component                             | Volume (µl) |
| 10X SuperScript III Buffer            | 2           |
| 25mM MgCl <sub>2</sub>                | 4           |
| 0.1M DTT                              | 2           |
| Superscript III Reverse Transcriptase | 2           |

poly-A tailed cDNA reaction synthesis components

Incubate  50 °C for  00:50:00 followed by  00:05:00 at  85 °C to deactivate the enzyme, then cool to  4 °C and proceed to the next step

### Optional: rRNA depletion

4 Add in the appropriate rRNA depletion oligos for you sample  2m

Incubate 90 °C for 00:02:00 and ramp down to Room temperature at 0.1 °C per second then proceed to the next step

## poly-A tailed (and ribosomal) RNA depletion

- 5 Add 2  $\mu\text{L}$  of RNase H
- 6 Incubate 37 °C for 00:20:00 followed by 00:05:00 at 65 °C to deactivate the 25m enzyme, then cool it to 4 °C and proceed to the next step

## poly-A tailed (and ribosomal) DNA depletion

- 7 Add in the following components and mix gently by pipetting

| A                              | B                        |
|--------------------------------|--------------------------|
| Component                      | Volume ( $\mu\text{L}$ ) |
| 10X Turbo DNase Buffer         | 4                        |
| Turbo DNase                    | 4                        |
| Nuclease-free H <sub>2</sub> O | 10                       |

DNase treatment components

- 8 Incubate at 37 °C for 00:30:00 30m

## Bead cleanup

- 9 Add 90  $\mu\text{L}$  (1.8X) of resuspended RNAClean XP Beads to the sample  
Mix by pipetting 10x

- 10 Incubate  00:15:00 at  On ice 15m
- 11 Place on the magnet, allow the beads to aggregate, and remove and discard the supernatant
- 12 Add  200  $\mu\text{L}$   80 % (v/v) ethanol and incubate (still on the magnet) for  00:00:30 30s
- 12.1 Remove the supernatant
- 12.2 Repeat  go to step #12 for a total of 2 washes
- 13 Air dry for  00:00:30, don't allow the beads to become cracked 30s
- 14 Remove the tubes from the magnetic rack  
Add  50  $\mu\text{L}$  H<sub>2</sub>O (optionally add-in  1  $\mu\text{L}$  RNase inhibitor) and resuspend the beads by pipetting  $\geq 10\times$
- 15 Incubate  00:05:00 at  Room temperature 5m
- 16 Place on the magnet, aspirate  50  $\mu\text{L}$  of the eluant into a new tube

## Optional: One-step RT-qPCR quantification

17

| A                                                  | B                 |
|----------------------------------------------------|-------------------|
| Component                                          | Volume ( $\mu$ l) |
| Luna Universal Probe One-Step Reaction Mix (2X)    | 5                 |
| Luna WarmStart RT Enzyme Mix (20X)                 | 0.5               |
| TaqMan GAPDH Control Reagents (human; 20x)         | 0.5               |
| TaqMan 18S rRNA Control Reagents (eukaryotic; 20x) | 0.5               |
| RNA                                                | 2                 |
| Nuclease-free H <sub>2</sub> O                     | 1.5               |

Luna RT-qPCR one-step quantification

18

| A                     | B        | C        | D      | E               |
|-----------------------|----------|----------|--------|-----------------|
| Step                  | Temp (C) | Time (s) | Cycles | Ramp Rate (C/s) |
| Reverse transcription | 55       | 600      | 1      | 2.73            |
| Denaturation          | 95       | 60       | 45     | 2.73            |
| Denaturation          | 95       | 10       |        | 2.73            |
| Amplification         | 60       | 30       |        | 2.11            |
| Capture               | 60       | 0        |        | –               |

Cycle parameters for QuantStudio 3
